# Supplementary material for: Glycoengineering HIV-1 Env creates ‘supercharged’ and ‘hybrid’ glycans to increase neutralizing antibody potency, breadth and saturation
Source: PubMed Central journal article supplement (PMC5951585; doi:10.1371/journal.ppat.1007024), 2018-05-02

# JR-FL gp160 $\Delta$ CT

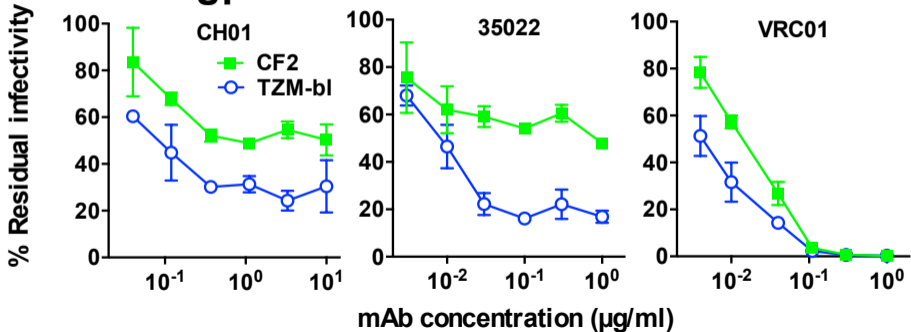

Supplement: ppat.1007024.s004.pdf [file ppat.1007024.s004.pdf]
