# Supplementary material for: Glycoengineering HIV-1 Env creates ‘supercharged’ and ‘hybrid’ glycans to increase neutralizing antibody potency, breadth and saturation
Source: PubMed Central journal article supplement (PMC5951585; doi:10.1371/journal.ppat.1007024), 2018-05-02

● control

✕ B4GalT1+ST6Gal1

□ BG505 K169E no trt

△ BG505 K169E B4GalT1+ST6Gal1

**A**

**BG505**

**CAP256 plasma**

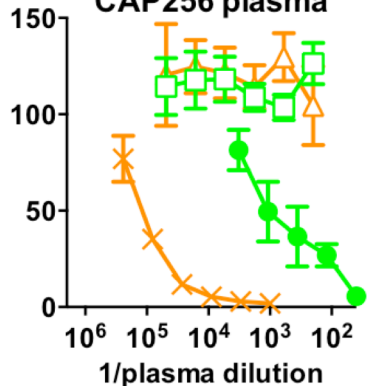

**B**

**JR-FL**

**N152 plasma**

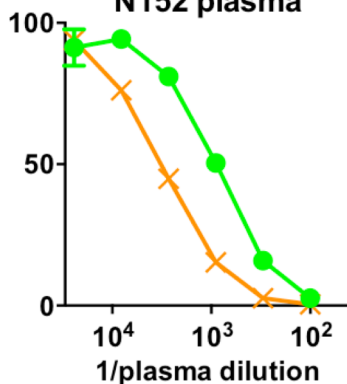

% Residual infectivity

**CAP256.09**

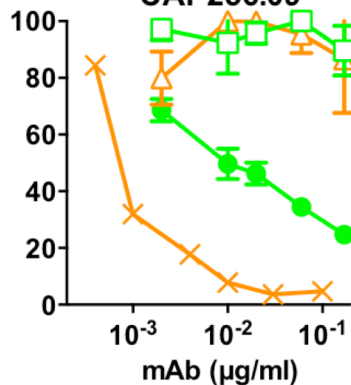

**35022**

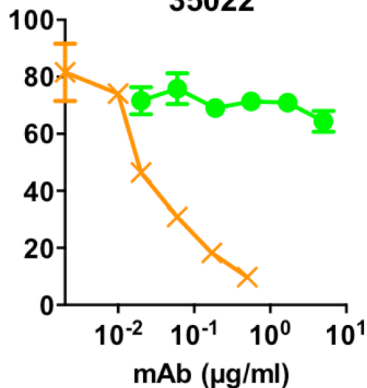

Supplement: ppat.1007024.s007.pdf [file ppat.1007024.s007.pdf]
