# Supplementary material for: Glycoengineering HIV-1 Env creates ‘supercharged’ and ‘hybrid’ glycans to increase neutralizing antibody potency, breadth and saturation
Source: PubMed Central journal article supplement (PMC5951585; doi:10.1371/journal.ppat.1007024), 2018-05-02
Supplement: ppat.1007024.s009.pdf [file ppat.1007024.s009.pdf]

### A) Control

#### Clade A/AE/AG

#### Clade B

#### Clade C

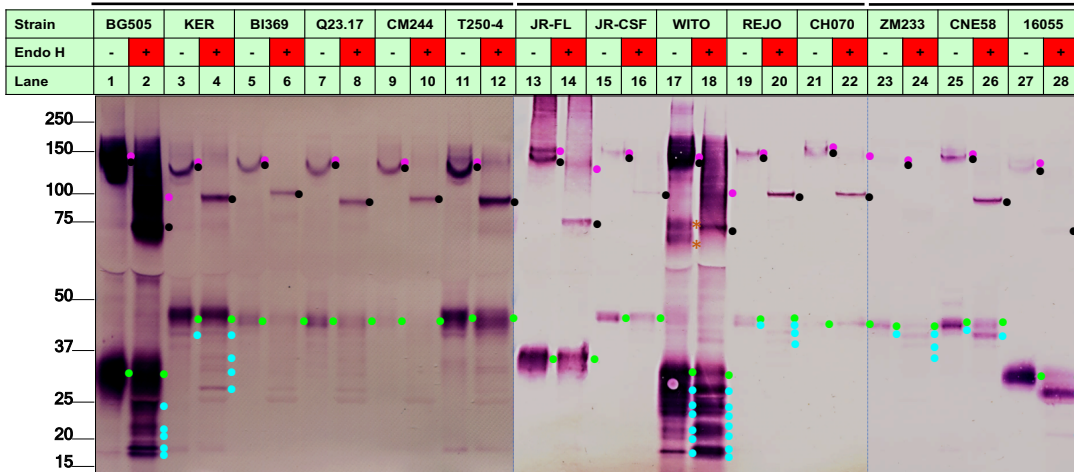

### B) B4Galt1

#### Clade A/AE/AG

#### Clade B

#### Clade C

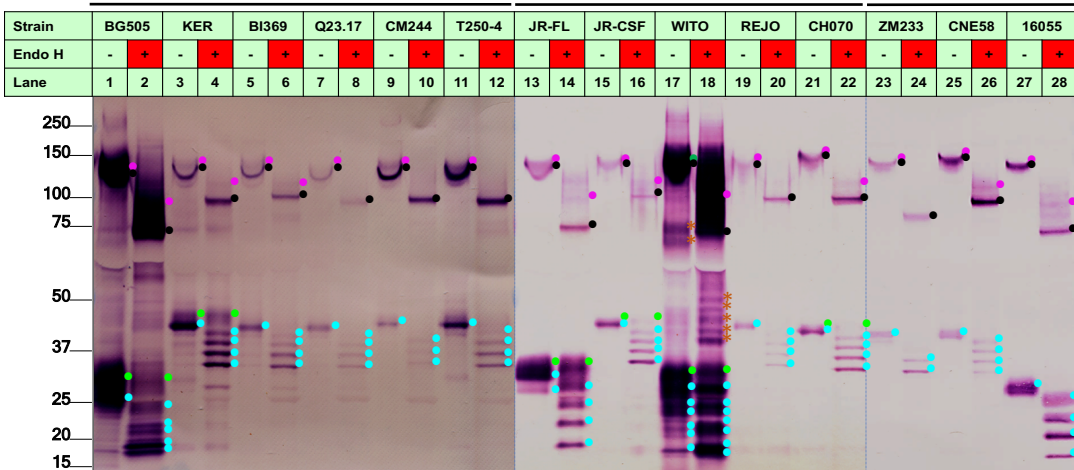

• gp160m

• gp160i

\* gp160i cleaved

• gp41m

• gp41i
