# Supplementary material for: Glycoengineering HIV-1 Env creates ‘supercharged’ and ‘hybrid’ glycans to increase neutralizing antibody potency, breadth and saturation
Source: PubMed Central journal article supplement (PMC5951585; doi:10.1371/journal.ppat.1007024), 2018-05-02
Supplement: ppat.1007024.s011.pdf [file ppat.1007024.s011.pdf]

Table with multiple columns of text, likely representing a sequence alignment or a data matrix. The table is organized into rows and columns, with some cells containing specific identifiers or codes. The text is dense and appears to be a technical or scientific dataset.
