# Supplementary material for: Glycoengineering HIV-1 Env creates ‘supercharged’ and ‘hybrid’ glycans to increase neutralizing antibody potency, breadth and saturation
Source: PubMed Central journal article supplement (PMC5951585; doi:10.1371/journal.ppat.1007024), 2018-05-02
Supplement: ppat.1007024.s015.pdf [file ppat.1007024.s015.pdf]

|           | Clade/Strain<br>Modification | A      |         |          |        | AE        | AG     | B     |        |        |        | BC      | C       |        |        | Geo Mean |
|-----------|------------------------------|--------|---------|----------|--------|-----------|--------|-------|--------|--------|--------|---------|---------|--------|--------|----------|
|           |                              | BG505  | KER2018 | BI369.9A | Q23.17 | CM244.ec1 | T250-4 | JR-FL | JR-CSF | WITO   | REJO   | CH070.1 | ZM233.6 | CNE58  | 16055  |          |
| PG9       | Control                      | 0.080  | 0.009   | 0.070    | 0.010  | 0.001     | 0.003  | 0.300 | 0.006  | 0.010  | 0.030  | 0.009   | 0.010   | 0.060  | 0.050  | 0.017    |
|           | B4GalT1                      | 0.050  | 0.009   | 0.005    | 0.004  | 0.010     | 0.002  | 0.030 | 0.003  | 0.003  | 0.002  | 0.010   | 0.003   | 0.030  | 0.010  | 0.007    |
|           | ST6Gal1                      | 0.006  | 0.005   | 0.005    | 0.002  | 0.010     | 0.002  | 0.030 | 0.001  | 0.008  | 0.002  | 0.007   | 0.003   | 0.010  | 0.006  | 0.005    |
|           | B4GalT1+ST6Gal1              | 0.020  | 0.005   | 0.010    | 0.003  | 0.004     | 0.001  | 0.020 | 0.0009 | 0.0004 | 0.003  | 0.002   | 0.001   | 0.005  | 0.008  | 0.003    |
|           | NA                           | 0.300  | 0.050   | 0.100    | 0.020  | 0.010     | 0.008  | 1.0   | 0.020  | 0.020  | 0.040  | 0.030   | 0.030   | 0.070  | 0.200  | 0.045    |
| CAP256.09 | Control                      | 0.007  | 0.004   | 0.005    | 3.0    | 0.130     | 0.002  | 10    | 10     | 10     | 10     | 0.020   | 0.0008  | 0.005  | 0.004  | 0.011    |
|           | B4GalT1                      | 0.002  | 0.002   | 0.001    | 3.0    | 0.100     | 0.001  | 10    | 10     | 10     | 10     | 0.006   | 0.0002  | 0.0008 | 0.001  | 0.004    |
|           | ST6Gal1                      | 0.0003 | 0.0002  | 0.0002   | 10     | 0.020     | 0.0002 | 10    | 10     | 10     | 10     | 0.0009  | 0.0002  | 0.0006 | 0.001  | 0.001    |
|           | B4GalT1+ST6Gal1              | 0.0002 | 0.0003  | 0.0004   | 0.010  | 0.020     | 0.0002 | 10    | 10     | 10     | 10     | 0.0003  | 0.0008  | 0.0006 | 0.0003 | 0.001    |
|           | NA                           | 3.0    | 0.009   | 0.050    | 10     | 10        | 0.004  | 10    | 10     | 10     | 10     | 0.040   | 0.010   | 0.010  | 0.010  | 0.171    |
| PGT151    | Control                      | 0.009  | 0.080   | 0.020    | 0.030  | 10        | 0.008  | 0.020 | 0.020  | 0.030  | 0.030  | 10      | 0.010   | 0.010  | 0.200  | 0.023    |
|           | GnT1-                        | ND     | 10      | ND       | ND     | 10        | 0.070  | 0.40  | 10     | 10     | 0.120  | 10      | 10      | ND     | 10     | 2.1      |
|           | B4GalT1                      | 0.020  | 1.0     | 0.32     | 2.0    | 10        | 0.070  | 2.0   | 10     | 10     | 0.51   | 10      | 10      | 0.080  | 10     | 0.97     |
|           | B4GalT1+NA                   | 0.008  | 0.090   | 0.220    | 0.050  | 10        | 0.020  | 0.50  | 0.006  | 10     | 0.280  | 10      | 10      | 0.120  | 10     | 0.224    |
|           | B4GalT1+ST6Gal1              | 0.040  | 1       | 5.0      | 0.40   | 10        | 0.030  | 0.80  | 10     | 10     | 0.210  | 10      | 10      | 0.100  | 10     | 0.93     |
| PGT121    | Control                      | 0.050  | 10      | 0.020    | 0.006  | 10        | 0.020  | 0.100 | 0.040  | 0.67   | 10     | 0.020   | 0.060   | 10     | 3.0    | 0.205    |
|           | GnT1-                        | ND     | 10      | 0.010    | 0.007  | 10        | 0.020  | 0.020 | 0.060  | 2.0    | 0.950  | 0.130   | 10      | ND     | 10     | 0.201    |
|           | B4GalT1                      | 0.050  | 10      | 0.008    | 0.005  | 10        | 0.006  | 0.040 | 0.030  | 0.260  | 0.070  | 0.020   | 0.150   | 0.100  | 0.090  | 0.057    |
|           | B4GalT1+ST6Gal1              | 0.020  | 10      | 0.007    | 0.002  | 10        | 0.003  | 0.010 | 0.020  | 0.130  | 0.050  | 0.009   | 0.53    | 0.160  | 0.080  | 0.040    |
|           | NA                           | 0.009  | 0.42    | 0.001    | 0.002  | 10        | 0.002  | 0.010 | 0.009  | 0.090  | 0.007  | 0.006   | 0.040   | 0.100  | 0.010  | 0.013    |
| 35022     | Control                      | 10     | 10      | 10       | 10     | 10        | 10     | 10    | 10     | 10     | 10     | 10      | 10      | 10     | 10     | 10       |
|           | GnT1-                        | ND     | 0.010   | 0.009    | 0.010  | 0.006     | 0.010  | 0.008 | 0.030  | 0.090  | 0.004  | 0.080   | 0.030   | ND     | 0.150  | 0.019    |
|           | B4GalT1                      | 10     | 10      | 0.005    | 0.020  | 0.005     | 10     | 0.020 | 0.030  | 10     | 0.002  | 10      | 0.004   | 2.0    | 10     | 0.192    |
|           | B4GalT1+ST6Gal1              | 10     | 10      | 0.010    | 10     | 0.002     | 10     | 0.010 | 0.200  | 5.0    | 0.009  | 10      | 0.020   | 2.0    | 10     | 0.40     |
|           | NA                           | 10     | 0.300   | 0.940    | 0.050  | 0.080     | 0.060  | 10    | 10     | 10     | 10     | 10      | 10      | 0.160  | 10     | 1.2      |
| CH01      | Control                      | ND     | 0.030   | 0.040    | 0.003  | 0.020     | 0.020  | 0.040 | 0.090  | 0.030  | 10     | 0.600   | 0.005   | ND     | 10     | 0.029    |
|           | GnT1-                        | ND     | 0.001   | 0.007    | 10     | 0.0008    | 0.001  | 0.008 | 0.002  | 0.008  | 0.001  | 0.003   | 0.0005  | ND     | 0.002  | 0.004    |
|           | B4GalT1                      | 0.030  | 0.020   | 0.009    | 3.0    | 0.0007    | 0.0009 | 0.050 | 0.003  | 0.002  | 0.001  | 0.050   | 0.006   | 0.030  | 0.140  | 0.013    |
|           | B4GalT1+ST6Gal1              | 0.020  | 0.030   | 0.040    | 0.50   | 0.001     | 0.002  | 0.060 | 0.003  | 0.001  | 0.001  | 0.010   | 0.004   | 0.020  | 0.100  | 0.011    |
|           | NA                           | 0.003  | 0.009   | 0.006    | 10     | 0.002     | 0.0008 | 0.020 | 0.0007 | 0.0008 | 0.0004 | 0.010   | 0.003   | 0.005  | 0.002  | 0.005    |
| VRC13     | Control                      | 0.40   | 0.030   | 0.020    | 0.080  | 0.030     | 10     | 0.050 | 0.050  | 0.110  | 0.030  | 10      | 0.020   | 0.020  | 0.150  | 0.076    |
|           | GnT1-                        | ND     | 0.070   | 0.004    | 0.010  | 0.008     | 10     | 0.009 | 0.009  | 0.060  | 0.010  | 10      | 0.100   | ND     | 0.300  | 0.039    |
|           | B4GalT1                      | 0.100  | 2.0     | 0.006    | 0.050  | 0.030     | 10     | 0.040 | 0.030  | 10     | 0.040  | 10      | 0.010   | 0.020  | 0.110  | 0.105    |
|           | B4GalT1+ST6Gal1              | 0.80   | 1.0     | 0.070    | 0.100  | 0.080     | 0.200  | 0.030 | 0.060  | 10     | 0.020  | 10      | 0.030   | 0.030  | 0.100  | 0.130    |
|           | NA                           | 0.090  | 0.050   | 0.010    | 0.030  | 0.090     | 0.030  | 0.040 | 0.009  | 10     | 0.005  | 10      | 0.010   | 0.020  | 0.040  | 0.039    |
| VRC38     | Control                      | 0.030  | 0.070   | 0.010    | 0.030  | 0.010     | 0.43   | 0.020 | 0.020  | 0.100  | 0.006  | 10      | 0.009   | 0.010  | 0.040  | 0.026    |
|           | GnT1-                        | 0.200  | 0.060   | 1.1      | 0.01   | 1.0       | 0.070  | 0.280 | 0.320  | 0.020  | 3.0    | 10      | 10      | 0.59   | 6.0    | 0.273    |
|           | B4GalT1                      | ND     | 0.015   | ND       | 0.005  | 0.280     | 0.160  | 0.030 | 0.180  | 0.020  | 0.050  | 10      | 10      | ND     | 0.240  | 0.055    |
|           | B4GalT1+ST6Gal1              | 0.200  | 0.020   | 0.85     | 0.004  | 1.1       | 0.140  | 0.200 | 0.150  | 0.010  | 0.200  | 10      | 10      | 0.230  | 1.9    | 0.140    |
|           | NA                           | 0.40   | 10      | 10       | 10     | 10        | 10     | 10    | 10     | 10     | ND     | 10      | 10      | 10     | 10     | 2.0      |
| 8ANC195   | Control                      | 0.140  | 10      | 10       | 10     | 10        | 10     | 10    | 10     | 10     | ND     | 10      | 10      | 10     | 10     | 1.2      |
|           | B4GalT1                      | 0.140  | 10      | 10       | 10     | 10        | 10     | 10    | 10     | 10     | ND     | 10      | 10      | 10     | 10     | 1.2      |
|           | B4GalT1+ST6Gal1              | 0.022  | 10      | 10       | 10     | 10        | 10     | 10    | 10     | 0.220  | ND     | 10      | 10      | 10     | 10     | 0.070    |

≤0.003  
 0.004 - 0.010  
 0.011 - 0.030  
 0.031 - 0.100  
 0.110 - 0.300  
 >0.300

p values for Wilcoxon Signed Rank tests on mAb IC50s against GE viruses compared to control untreated viruses

|                 | PG9 | CAP256.09 | PGT151 | PGT121 | 35022 | CH01 | PGT145 | VRC13 | VRC38.01 |
|-----------------|-----|-----------|--------|--------|-------|------|--------|-------|----------|
| ST6Gal1         | **  | ns        |        |        |       |      |        |       |          |
| B4GalT1         | **  | **        | ***    | *      | **    |      | ns     | ns    |          |
| B4GalT1+ST6Gal1 | *** | **        | ***    | *      | **    |      | ns     | ns    | *        |
| NA              | *** | **        | *      | ***    |       |      | ns     | **    |          |
| B4GalT1+NA      |     |           | **     | ***    |       |      | ns     | ns    |          |
| GnT1-           |     |           | **     | ns     | ***   | **   | ns     | ns    | *        |

ns=not significant

\* <=0.05

\*\* <=0.01

\*\*\* <=0.001

\*\*\*\* <=0.0001

\* = increased potency

\* = reduced potency
