# Supplementary material for: Glycoengineering HIV-1 Env creates ‘supercharged’ and ‘hybrid’ glycans to increase neutralizing antibody potency, breadth and saturation
Source: PubMed Central journal article supplement (PMC5951585; doi:10.1371/journal.ppat.1007024), 2018-05-02
Supplement: ppat.1007024.s016.pdf [file ppat.1007024.s016.pdf]

|           |                           | Strain          | ZM233.6 | T250-4 | 16055  | C1080.c3 | Q23.17 | WITO.33 | KER2018 | CAP256<br>week 34 | CM244.ec1 | Geo Mean |               |
|-----------|---------------------------|-----------------|---------|--------|--------|----------|--------|---------|---------|-------------------|-----------|----------|---------------|
|           |                           | Modification    |         |        |        |          |        |         |         |                   |           |          |               |
| CAP256.09 | Mature                    | Untreated       | 0.0008  | 0.002  | 0.004  | 10       | 3.0    | 10      | 0.004   | 0.003             | 0.130     | 0.027    | ≤0.003        |
|           |                           | B4GalT1+ST6Gal1 | 0.00008 | 0.0002 | 0.0003 | 0.003    | 0.010  | 10      | 0.0003  | 0.0001            | 0.020     | 0.001    | 0.004 - 0.010 |
|           |                           | GnT1-           | 0.006   | 0.020  | 0.010  | 10       | 10     | 10      | 0.015   | 0.010             | 0.80      | 0.105    | 0.011 - 0.030 |
|           | Ancestor<br>I1            | Untreated       | 10      | 9.5    | 10     | 10       | 10     | 10      | 10      | 0.080             | 10        | 1.966    | 0.031 - 0.100 |
|           |                           | B4GalT1+ST6Gal1 | 10      | 9.0    | 9.5    | 10       | 10     | 10      | 10      | 0.030             | 10        | 1.369    | 0.110 - 0.300 |
|           |                           | GnT1-           | 10      | 9.0    | 0.080  | 10       | 10     | 10      | 10      | 0.010             | 10        | 0.193    | >0.300        |
|           | UCA                       | Untreated       | 10      | 10     | 10     | 10       | 10     | 10      | 10      | 1.5               | 10        | 1.5      |               |
|           |                           | B4GalT1+ST6Gal1 | 10      | 10     | 10     | 10       | 10     | 10      | 10      | 0.30              | 10        | 0.30     |               |
|           |                           | GnT1-           | 10      | 10     | 10     | 10       | 10     | 10      | 10      | 0.40              | 10        | 0.40     |               |
| PG9       | Mature                    | Untreated       | 0.010   | 0.003  | 0.050  | 0.003    | 0.010  | 0.010   | 0.009   | 0.020             | 0.001     | 0.008    |               |
|           |                           | B4GalT1+ST6Gal1 | 0.001   | 0.001  | 0.008  | 0.002    | 0.003  | 0.0004  | 0.005   | 0.006             | 0.004     | 0.002    |               |
|           |                           | GnT1-           | 0.004   | 0.020  | 0.050  | 0.020    | 0.010  | 0.010   | 0.030   | 0.060             | 0.030     | 0.020    |               |
|           | Ancestor<br>gHmL          | Untreated       | 0.42    | 0.060  | 1.0    | 0.040    | 0.160  | 0.90    | 0.40    | 0.90              | 0.110     | 0.262    |               |
|           |                           | B4GalT1+ST6Gal1 | 0.060   | 0.030  | 1.5    | 0.040    | 0.100  | 0.260   | 0.190   | 1.3               | 0.180     | 0.171    |               |
|           |                           | GnT1-           | 0.020   | 0.040  | 0.50   | 0.120    | 0.020  | 1.0     | 0.160   | 0.43              | 0.060     | 0.117    |               |
| CH04      | Mature                    | Untreated       | 10      | 0.070  | 10     | 0.070    | 0.020  | 0.50    | 0.30    | 0.41              | 0.070     | 0.33     |               |
|           |                           | GnT1-           | 0.008   | 0.020  | 0.5    | 0.060    | 0.005  | 0.050   | 0.01    | 0.070             | 0.020     | 0.029    |               |
|           | Ancestor<br>RUA HC RUA LC | Untreated       | 10      | 10     | 10     | 2.0      | 0.010  | 4.0     | 10      | 10                | 10        | 0.95     |               |
|           |                           | GnT1-           | 10      | 10     | 10     | 10       | 0.002  | 1.0     | 0.200   | 10                | 10        | 0.251    |               |
| PGT145    | Mature                    | Untreated       | 2.0     | 0.001  | 0.015  | 0.004    | 0.8    | 0.004   | 0.004   | 0.5               | 0.002     | 0.023    |               |
|           |                           | GnT1-           | 0.0005  | 0.001  | 0.002  | 0.010    | 10     | 0.008   | 0.001   | 0.003             | 0.0008    | 0.005    |               |
|           | Ancestor<br>mHgL          | Untreated       | 10      | 0.5    | 10     | 10       | 10     | 0.010   | 10      | 10                | 0.060     | 0.234    |               |
|           |                           | GnT1-           | 10      | 10     | 3.0    | 10       | 10     | 0.020   | 10      | 10                | 0.030     | 0.37     |               |
| VRC38     | Mature                    | Untreated       | 10      | 0.070  | 6.0    | 0.010    | 0.010  | 0.020   | 0.060   | 10                | 1         | 0.091    |               |
|           |                           | GnT1-           | 10      | 0.160  | 0.240  | 0.010    | 0.005  | 0.020   | 0.015   | 10                | 0.280     | 0.040    |               |
|           | Ancestor<br>mHgL          | Untreated       | 10      | 0.150  | 10     | 0.47     | 0.100  | 0.130   | 0.230   | 10                | 10        | 0.184    |               |
|           |                           | GnT1-           | 10      | 0.230  | 10     | 0.040    | 0.015  | 0.210   | 0.040   | 10                | 10        | 0.065    |               |
